# Supplementary material for: Analysis of cell-cell bridges in Haloferax volcanii using Electron cryo-tomography reveal a continuous cytoplasm and S-layer
Source: bioRxiv or medRxiv preprint supplement (doi:10.1101/2020.09.30.320622), 2020-09-30
Supplement: Supplementary file [file media-1.pdf]

Supplementary material to

Analysis of cell-cell bridges in *Haloferax volcanii*  
using Electron cryo-tomography

Shamphavi Sivabalasarma<sup>1</sup>, Hannah Wetzel<sup>1</sup>, Phillip Nußbaum<sup>1</sup>, Morgan Beeby<sup>2</sup> and  
Sonja-Verena Albers<sup>1</sup>

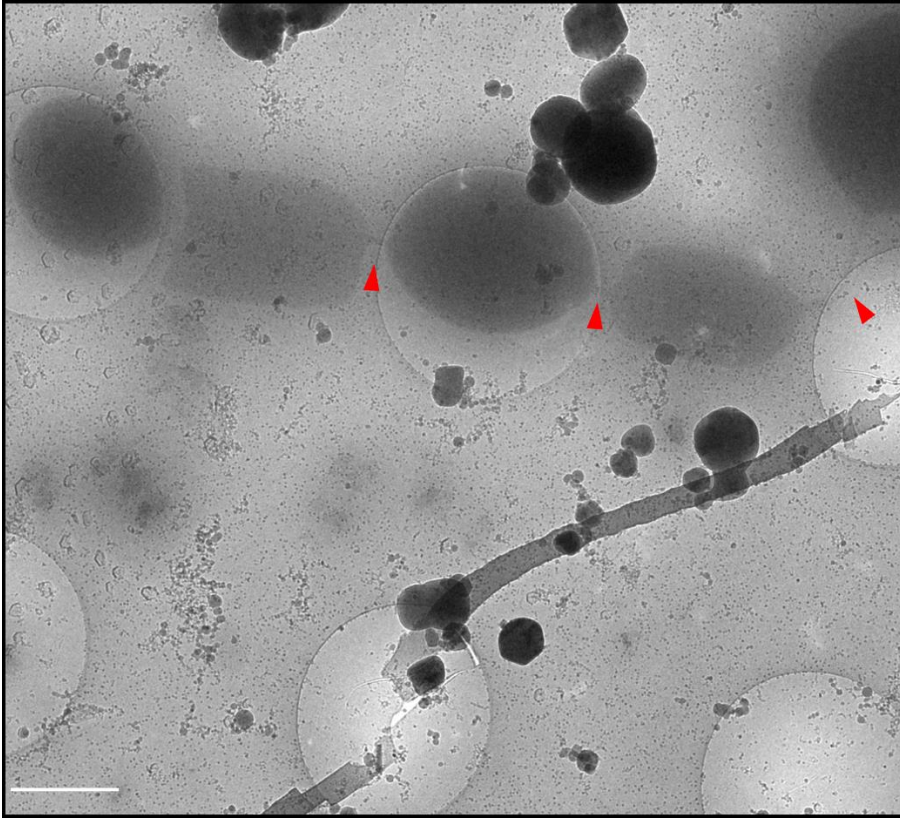

**Supplementary Figure 1: Cryo-electron micrograph of a chain of cells.** The cell body are connected via intercellular bridges indicated with the red arrows. Scale bar is 500 nm.

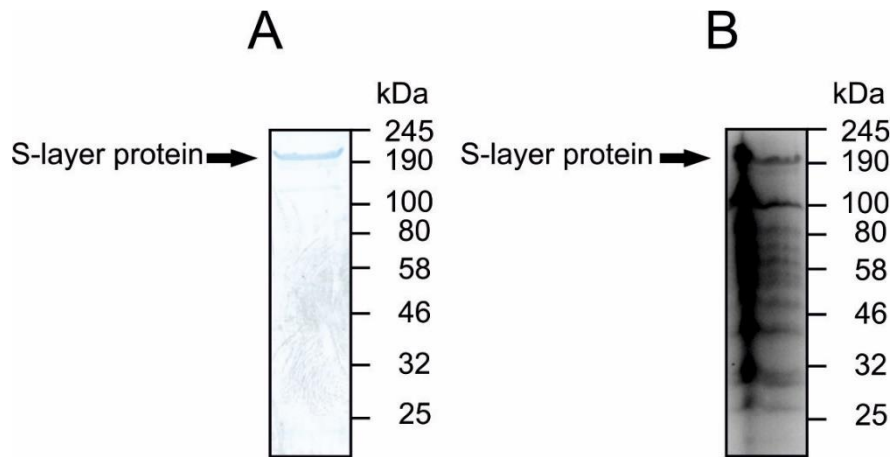

**Supplementary Figure 2: SDS-PAGE and Fluorescence detection of isolated S-layer from *H. volcanii*.** (A) To verify the staining of the S-layer with AlexaFluor488, S-layer was isolated. The indicated band running at 190 kDa was verified as S-layer glycoprotein via Mass spectrometry. (B) The S-layer and membrane were isolated from fluorescently stained cells and the fluorescence signal was detected. The band running at 190 kDa corresponds to (A) and can be determined as S-layer glycoprotein.

**Supplementary movie 1:**

**Tomographic reconstruction of a cell-cell bridge. Scale bar is 100nm**

**Supplementary movie 2:**

**Fluorescence time-lapse microscopy of *H. volcanii* cells on an agar pad stained with Alexa Fluor 488 NHS Ester. Scale bar is 4  $\mu\text{m}$**

**Supplementary Table 1: Measured S-layer thickness and cell-cell width of selected reconstructed tomograms**

| Session and tomography stack number |    | S-Layer /nm | Average thickness S-Layer /nm | Bridge width/nm |        | Average bridge of width /nm | Standard error width | Length /nm |
|-------------------------------------|----|-------------|-------------------------------|-----------------|--------|-----------------------------|----------------------|------------|
| 1                                   | 1  | 16.80       | 15.20                         | 107.39          | 81.23  | 96.65                       | 23.24                | 1070.96    |
|                                     |    | 14.64       |                               | 107.75          | 61.47  |                             |                      |            |
|                                     |    | 14.16       |                               | 127.96          | 94.09  |                             |                      |            |
|                                     | 7  | 23.60       | 23.24                         | 106.93          | 94.38  | 93.32                       | 11.06                | 738.71     |
|                                     |    | 22.90       |                               | 96.14           | 74.63  |                             |                      |            |
|                                     |    | 23.02       |                               | 99.75           | 88.11  |                             |                      |            |
|                                     |    | 23.42       |                               |                 |        |                             |                      |            |
|                                     | 20 | 18.73       | 20.46                         | 79.63           | 75.56  | 77.10                       | 2.96                 | 266.94     |
|                                     |    | 20.04       |                               | 80.05           | 72.78  |                             |                      |            |
|                                     |    | 22.61       |                               | 79.24           | 75.34  |                             |                      |            |
|                                     | 30 | 14.48       | 17.58                         | 100.19          | 97.12  | 96.43                       | 5.05                 | 429.33     |
|                                     |    | 20.70       |                               | 96.93           | 102.73 |                             |                      |            |
|                                     |    | 17.55       |                               | 88.63           | 92.97  |                             |                      |            |
|                                     | 37 | 22.60       | 19.25                         | 82.21           | 85.96  | 86.54                       | 7.43                 | 1151.52    |
|                                     |    | 16.30       |                               | 82.10           | 81.49  |                             |                      |            |
|                                     |    | 18.84       |                               | 101.10          | 86.40  |                             |                      |            |
|                                     |    |             |                               |                 |        |                             |                      |            |
| 2                                   | 15 | 21.73       | 19.60                         | 97.43           | 99.93  | 102.44                      | 10.62                | 880.48     |

|   |    |       |       |        |        |        |       |         |
|---|----|-------|-------|--------|--------|--------|-------|---------|
|   |    | 17.83 |       | 117.01 | 118.44 |        |       |         |
|   |    | 19.25 |       | 92.87  | 108.40 |        |       |         |
|   | 23 | 17.19 | 19.26 | 90.61  | 65.33  | 78.75  | 17.31 | 2144.91 |
|   |    | 20.69 |       | 103.77 | 61.26  |        |       |         |
|   |    | 19.91 |       | 86.44  | 65.11  |        |       |         |
|   | 29 | 24.61 | 22.63 | 79.48  | 76.33  | 71.67  | 8.68  | 265.32  |
|   |    | 21.49 |       | 61.32  | 81.21  |        |       |         |
|   |    | 21.78 |       | 62.11  | 69.57  |        |       |         |
|   | 41 | 23.33 | 22.30 | 57.96  | 80.38  | 72.00  | 9.43  | 529.35  |
|   |    | 21.73 |       | 72.27  | 72.02  |        |       |         |
|   |    | 21.85 |       | 85.77  | 72.43  |        |       |         |
|   | 56 | 27.12 | 25.71 | 81.70  | 49.05  | 57.63  | 13.33 | 801.29  |
|   |    | 26.00 |       | 54.06  | 43.05  |        |       |         |
|   |    | 24.01 |       | 57.10  | 60.80  |        |       |         |
|   | 73 | 19.54 | 19.81 | 168.34 | 169.09 | 162.24 | 6.81  | 358.65  |
|   |    | 20.24 |       | 163.55 | 152.62 |        |       |         |
|   |    | 19.66 |       | 154.83 | 161.20 |        |       |         |
|   |    |       |       |        |        |        |       |         |
|   | 87 | 18.51 | 18.32 | 98.43  | 98.72  | 96.12  | 4.69  | 955.13  |
|   |    | 17.12 |       | 99.21  | 88.94  |        |       |         |
|   |    | 19.32 |       | 90.72  | 91.97  |        |       |         |
|   |    |       |       |        |        |        |       |         |
| 3 |    |       |       |        |        |        |       |         |

|   |     |       |       |        |        |        |       |        |
|---|-----|-------|-------|--------|--------|--------|-------|--------|
|   | 67  | 18.86 | 23.18 | 148.05 | 124.85 | 131.46 | 10.54 | -      |
|   |     | 26.24 |       | 121.20 | 131.98 |        |       |        |
|   |     | 24.43 |       | 123.22 | 139.44 |        |       |        |
|   | 53  | 18.38 | 19.41 | 81.80  | 91.83  | 90.25  | 8.65  | 253.13 |
|   |     |       |       |        |        |        |       |        |
| 4 |     | 19.60 |       | 88.87  | 105.21 |        |       |        |
|   |     | 20.24 |       | 81.80  | 92.02  |        |       |        |
|   | 79  | 20.56 | 20.00 | 108.11 | 75.46  | 100.69 | 52.54 | -      |
|   |     | 21.85 |       | 113.27 | 132.93 |        |       |        |
|   |     | 17.60 |       | 163.16 | 11.20  |        |       |        |
|   | 146 | 19.78 | 20.40 | 71.23  | 67.33  | 71.77  | 3.04  | 570.92 |
|   |     | 20.30 |       | 73.11  | 69.65  |        |       |        |
|   |     | 21.13 |       | 75.98  | 73.30  |        |       |        |
|   |     |       |       |        |        |        |       |        |
| 5 |     |       |       |        |        |        |       |        |
|   | 6   | 22.80 | 20.66 | 154.64 | 125.70 | 133.71 | 29.82 | -      |
|   |     | 19.91 |       | 133.51 | 105.63 |        |       |        |
|   |     | 19.27 |       | 180.34 | 102.41 |        |       |        |
|   | 61  | 16.41 | 19.05 | 149.66 | 162.43 | 152.09 | 43.24 | -      |
|   |     | 19.53 |       | 199.80 | 100.85 |        |       |        |
|   |     | 21.21 |       | 196.40 | 103.38 |        |       |        |
|   | 72  | 19.87 | 20.52 | 69.55  | 62.40  | 69.60  | 1.17  | 463.76 |

|  |    |       |       |       |        |       |       |         |
|--|----|-------|-------|-------|--------|-------|-------|---------|
|  |    | 21.53 |       | 70.80 | 68.50  |       |       |         |
|  |    | 20.15 |       | 68.46 | 69.56  |       |       |         |
|  | 86 | 19.94 | 19.68 | 50.99 | 102.03 | 62.42 | 22.26 | 1059.26 |
|  |    | 20.21 |       | 50.43 | 46.82  |       |       |         |
|  |    | 18.88 |       | 48.13 | 76.09  |       |       |         |



**Supplementary Table 2: Measures average thickness of S-layer, widths of cell-cell bridges and measured lengths of the cell-cell bridges**

| Average S-layer thickness/ nm | average bridge width/nm | length/nm |
|-------------------------------|-------------------------|-----------|
| 15.20                         | 96.65                   | 1070.96   |
| 23.24                         | 93.32                   | 738.71    |
| 20.46                         | 77.10                   | 266.94    |
| 17.58                         | 96.43                   | 429.33    |
| 19.25                         | 86.54                   | 1151.52   |
| 19.60                         | 102.44                  | 880.48    |
| 19.26                         | 78.75                   | 2144.91   |
| 22.63                         | 71.67                   | 265.32    |
| 22.30                         | 72.00                   | 529.35    |
| 25.71                         | 57.63                   | 801.29    |
| 19.81                         | 162.24                  | 358.65    |
| 18.32                         | 96.12                   | 955.13    |
| 23.18                         | 131.46                  | -         |
| 19.41                         | 90.25                   | 253.13    |
| 20.00                         | 100.69                  | -         |
| 20.40                         | 71.77                   | 570.92    |
| 20.66                         | 133.71                  | -         |
| 19.05                         | 152.09                  | -         |

|       |       |         |
|-------|-------|---------|
| 20.52 | 69.60 | 463.76  |
| 19.68 | 62.42 | 1059.26 |
